# Supplementary material for: Increased Risk of Ischemic Stroke during Sleep in Apneic Patients
Source: PubMed Central journal article supplement — J Clin Neurol. 2018 Feb 28;14(2):174–8. doi: 10.3988/jcn.2018.14.2.174 (PMC5897199; doi:10.3988/jcn.2018.14.2.174), 2018-02-28
Supplement: jcn-14-174-s001.pdf [file jcn-14-174-s001.pdf]

**Supplementary Table 1.** Previous studies of the association between OSA and WUS

| Study                                | Number of patients | Proportion with WUS (%) | Proportion with OSA (%)                                          | Identification of OSA                                      | Results                                                                                        |
|--------------------------------------|--------------------|-------------------------|------------------------------------------------------------------|------------------------------------------------------------|------------------------------------------------------------------------------------------------|
| Palomäki et al. <sup>17</sup>        | 177                | 35.3                    | Snoring almost always: 52.3                                      | Standardized questionnaire for habitual symptoms of OSA    | Snoring was associated with WUS (MA)                                                           |
| Bassetti and Aldrich <sup>11</sup>   | 110                | 21                      | Snoring often or always: 49.1                                    | Sleep habits preceding stroke; poststroke PSG              | No significant association                                                                     |
| Martínez García et al. <sup>16</sup> | 139                | 60.4                    | High clinical probability of sleep apnea: 39.6                   | Questionnaire for habitual symptoms of OSA; poststroke PSG | High clinical probability of sleep apnea, AHI/longer desaturation was associated with WUS (UA) |
| Hsieh et al. <sup>12</sup>           | 71                 | 36.6                    | AHI $\geq$ 30: 19.8                                              | Questionnaire for sleep prior to stroke; poststroke PSG    | AHI $\geq$ 30 was associated with WUS (MA)                                                     |
| Tanimoto et al. <sup>13</sup>        | 72                 | 38.9                    | High risk of sleep apnea: 20.8                                   | Berlin Questionnaire                                       | No significant association                                                                     |
| Šiarnik et al. <sup>15</sup>         | 88                 | 18.2                    | AHI $>$ 30: 20.5                                                 | Poststroke PSG                                             | Higher AHI was associated with WUS (UA)                                                        |
| Current study                        | 260                | 25.8                    | High risk of sleep apnea: 22.7<br>Snoring almost every day: 18.5 | Berlin Questionnaire                                       | Apnea was associated with WUS (MA)                                                             |

AHI: apnea-hypopnea index, MA: multivariate analysis, OSA: obstructive sleep apnea, PSG: polysomnography, UA: univariate analysis, WUS: wake-up stroke.
